# Supplementary material for: Ag nanowires as precursors to synthesize Ag–ZnO nanostructured brushes
Source: Royal Society of Chemistry journal article supplement (doi:10.1039/c5ra04261e), 2015-01-01
Supplement: c5ra04261e1.pdf [file c5ra04261e1.pdf]

Supplementary Information (SI)

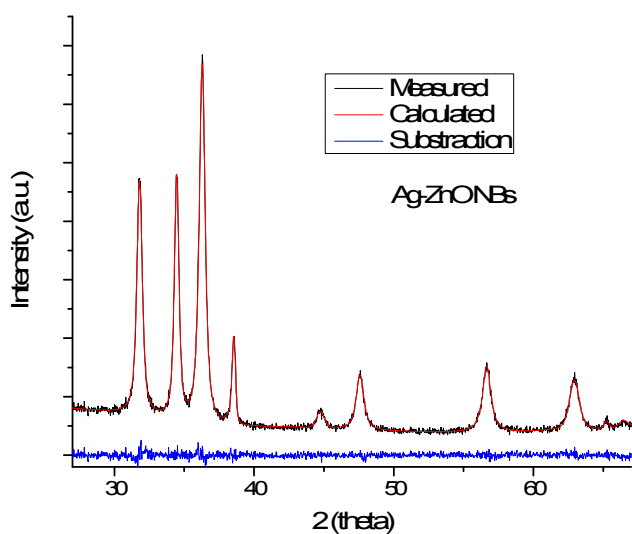

Rietveld refinement method and TOPAS program were used to determinate the crystallite size and the quantitative phases of the Ag-ZnO NBs from the XRD diffraction patterns.

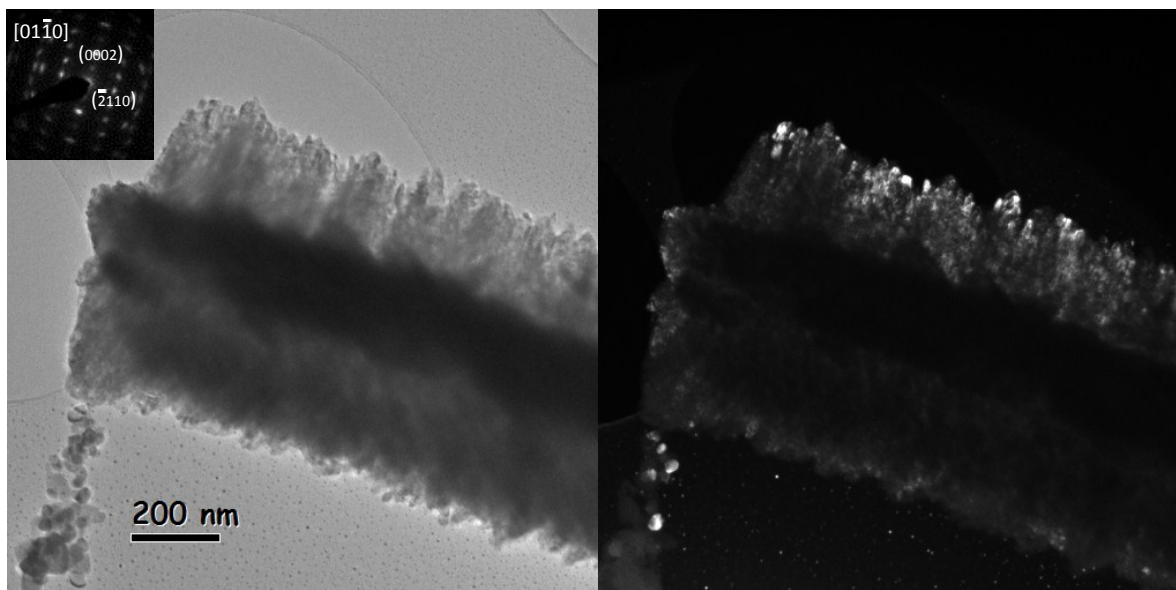

Figure. TEM image of the Ag-ZnO NBs. A) Bright Field image and B) Dark Field image obtained from the diffracted (0002) plane of the ZnO phase.
